# Supplementary material for: Deregulated miRNAs Contribute to Silencing of B-Cell Specific Transcription Factors and Activation of NF-κB in Classical Hodgkin Lymphoma
Source: MDPI journal article supplement (doi:10.3390/cancers13133131), 2021-06-23
Supplement: s1 [file s1]

---

# **Sypplementary Materials: Deregulated miRNAs Contribute to Silencing of B-cell Specific Transcription Factors and Activation of NF- $\kappa$ B in Classical Hodgkin Lymphoma**

Julia Paczkowska, Joanna Janiszewska, Adam Ustaszewski, Julia Bein, Marcin Skalski, Agnieszka Dzikiewicz-Krawczyk, Natalia Rozwadowska, Martin-Leo Hansmann, Sylvia Hartmann and Maciej Giefing

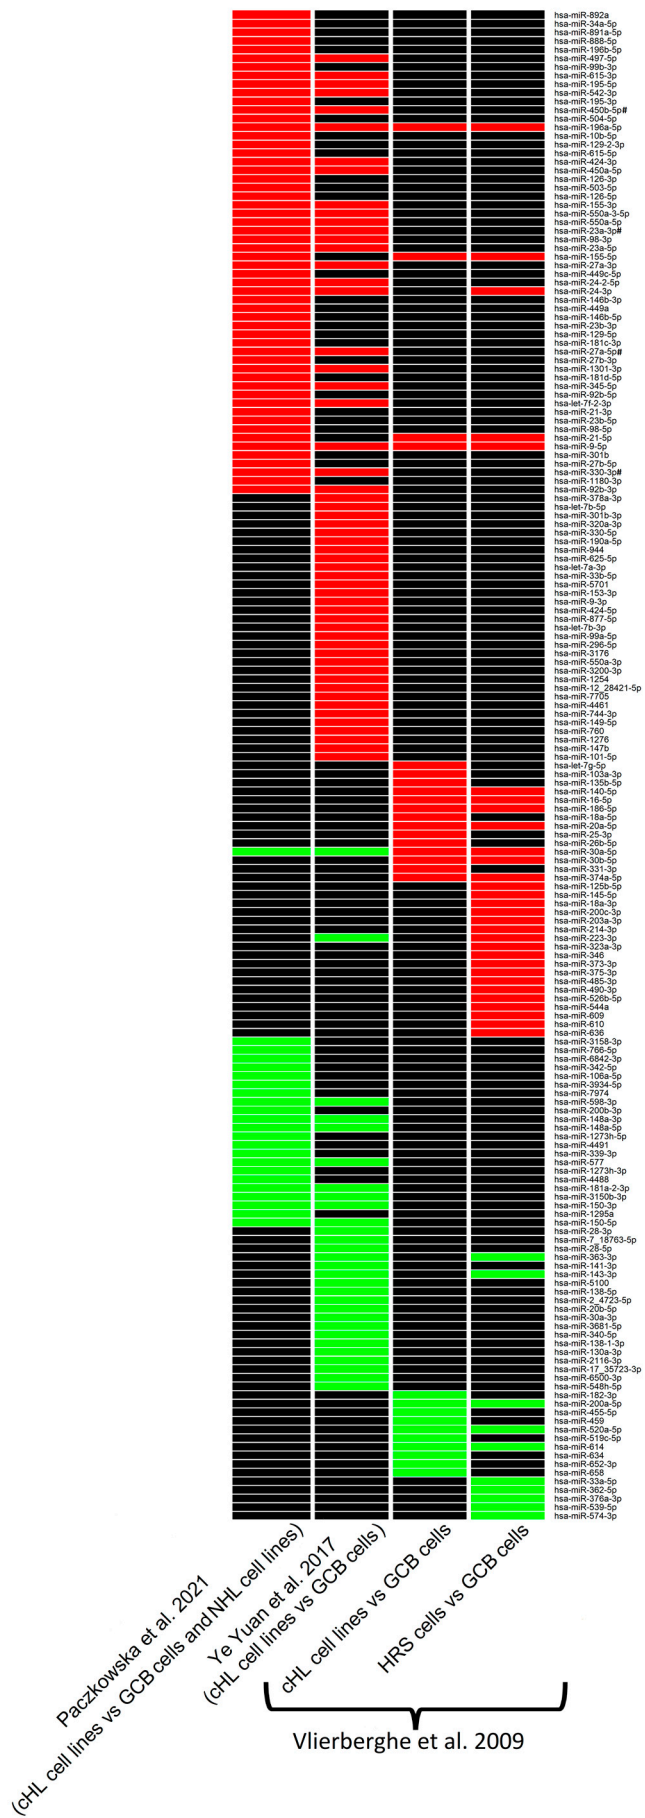

**Figure S1.** The overlap of deregulated miRNAs in cHL cell lines and primary HRS cells compared to NHL cell lines and GCB cells in previously published studies and this study. Columns represent miRNA expression profiles from the particular studies. Red and green colors indicate overexpressed and downregulated miRNAs, respectively, black color represents no significant change in miRNA expression in the respective study.

**Figure 3. L-428**

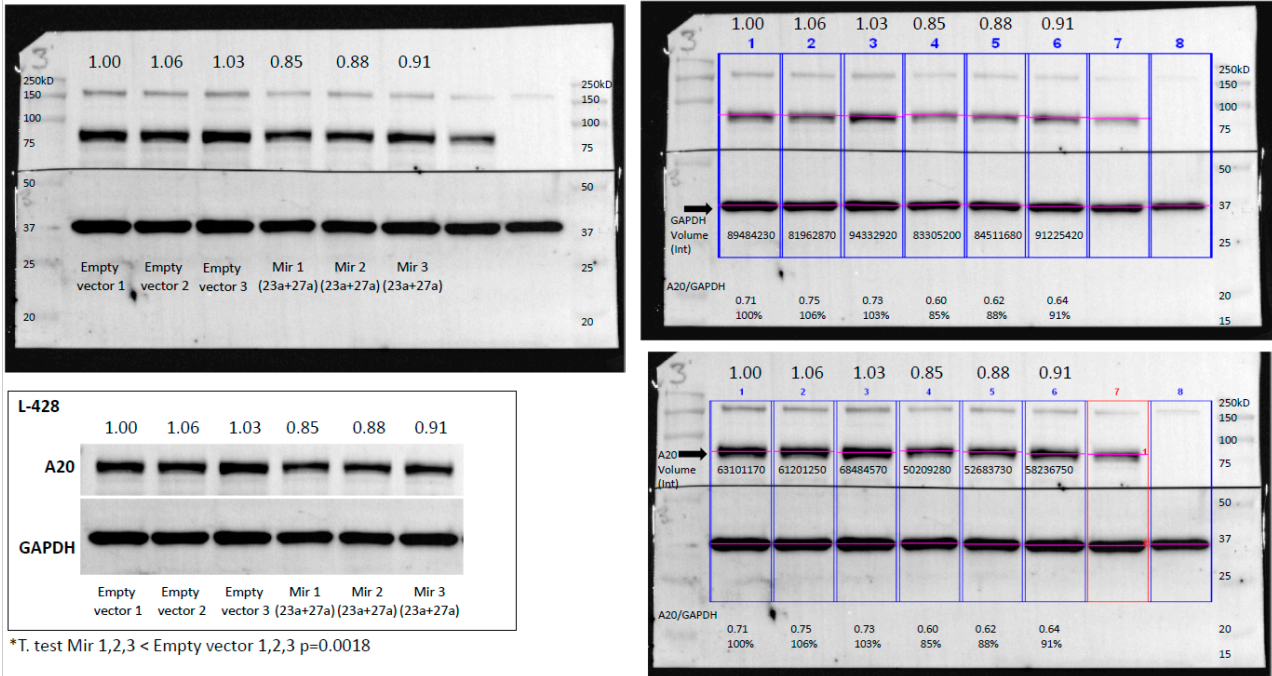

\*T. test Mir 1,2,3 < Empty vector 1,2,3 p=0.0018

**Figure 3. GCB6-16**

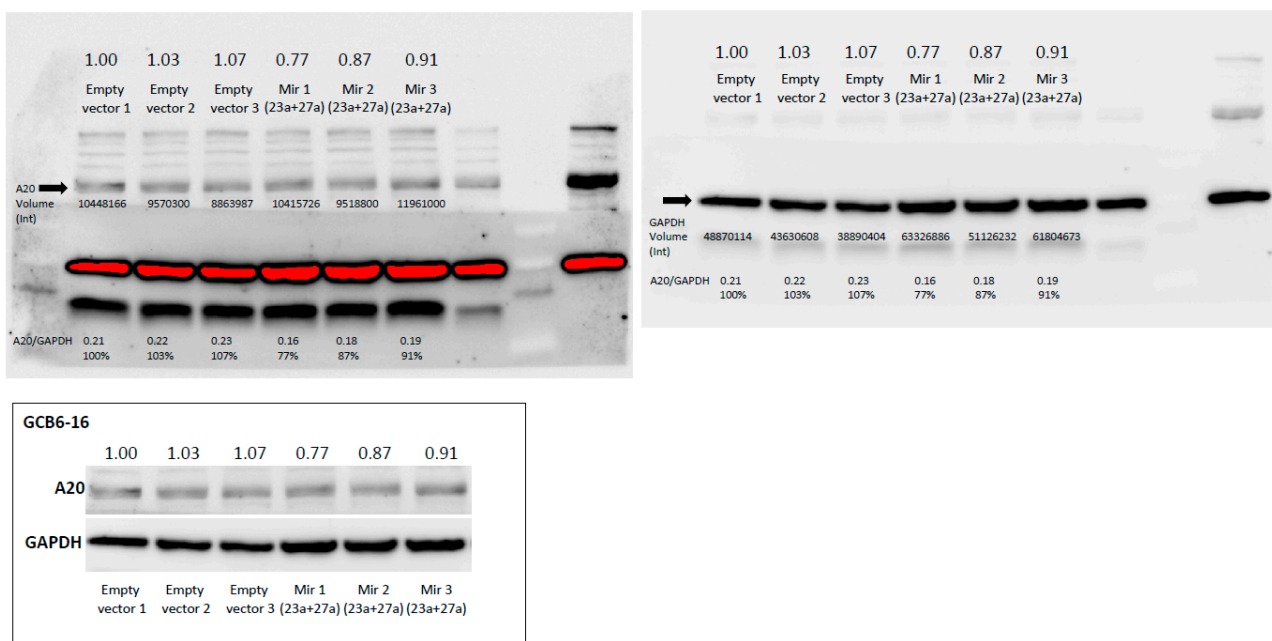

\*T. test Mir 1,2,3 < Empty vector 1,2,3 p= 0.0083

**Figure S2.** Uncropped Figure 3.
